# Supplementary material for: Use of costic acid, a natural extract from Dittrichia viscosa, for the control of Varroa destructor, a parasite of the European honey bee
Source: publisher site journal article supplement (doi:10.3762/bjoc.13.96), 2017-05-18

# Supporting Information

for

## **Use of costic acid, a natural extract from *Dittrichia viscosa*, for the control of *Varroa destructor*, a parasite of the European honey bee**

Kalliopi Sofou<sup>1</sup>, Demosthenis Isaakidis<sup>1</sup>, Apostolos Spyros<sup>1</sup>, Anita Büttner<sup>2,3</sup>, Athanassios Giannis\*<sup>2</sup> and Haralambos E. Katerinopoulos\*<sup>1</sup>

Address: <sup>1</sup>Department of Chemistry, University of Crete, Voutes, Heraklion, 71003, Crete, Greece,

<sup>2</sup>Institut für Organische Chemie, Universität Leipzig, Johannisallee 29, 04103 Leipzig, Germany and

<sup>3</sup>recent address: Department of Chemistry and Food Chemistry, TU Dresden, 01062, Dresden, Germany

Email: Athanassios Giannis\* - giannis@uni-leipzig.de; Haralambos E. Katerinopoulos\* - kater@chemistry.uoc.gr

\* Corresponding author

### **NMR, IR and MS spectra of costic acid**

#### **Table of contents:**

|                                                                                        |     |
|----------------------------------------------------------------------------------------|-----|
| <sup>1</sup> H NMR of costic acid                                                      | S2  |
| <sup>13</sup> C NMR of costic acid                                                     | S3  |
| DEPT 45°, 90° and 135° spectra of costic acid                                          | S4  |
| COSY spectrum of costic acid                                                           | S5  |
| COSY spectrum of costic acid (0.0–4.5 ppm)                                             | S6  |
| HMBC spectrum of costic acid                                                           | S7  |
| HMBC spectrum of costic acid ( <sup>13</sup> C: 0–65 ppm; <sup>1</sup> H: 0.0–2.6 ppm) | S8  |
| HMQC spectrum of costic acid                                                           | S9  |
| HMQC spectrum of costic acid ( <sup>13</sup> C: 0–65 ppm; <sup>1</sup> H: 0.0–2.6 ppm) | S10 |
| NOESY spectrum of costic acid                                                          | S11 |
| NOESY spectrum of costic acid (0.7–3.1 ppm)                                            | S12 |
| FTIR spectrum of costic acid                                                           | S13 |
| Mass spectrum of costic acid                                                           | S14 |

$^1\text{H}$  NMR of costic acid

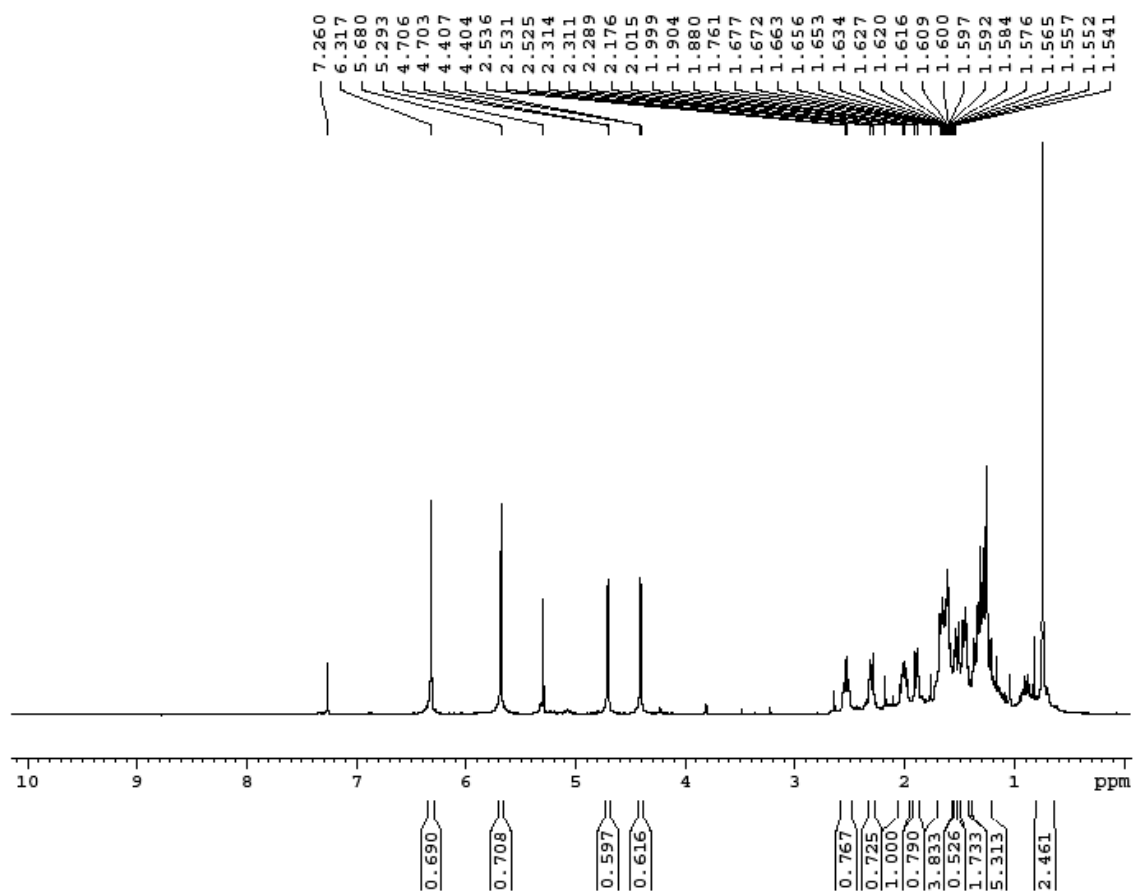

$^{13}\text{C}$  NMR of costic acid

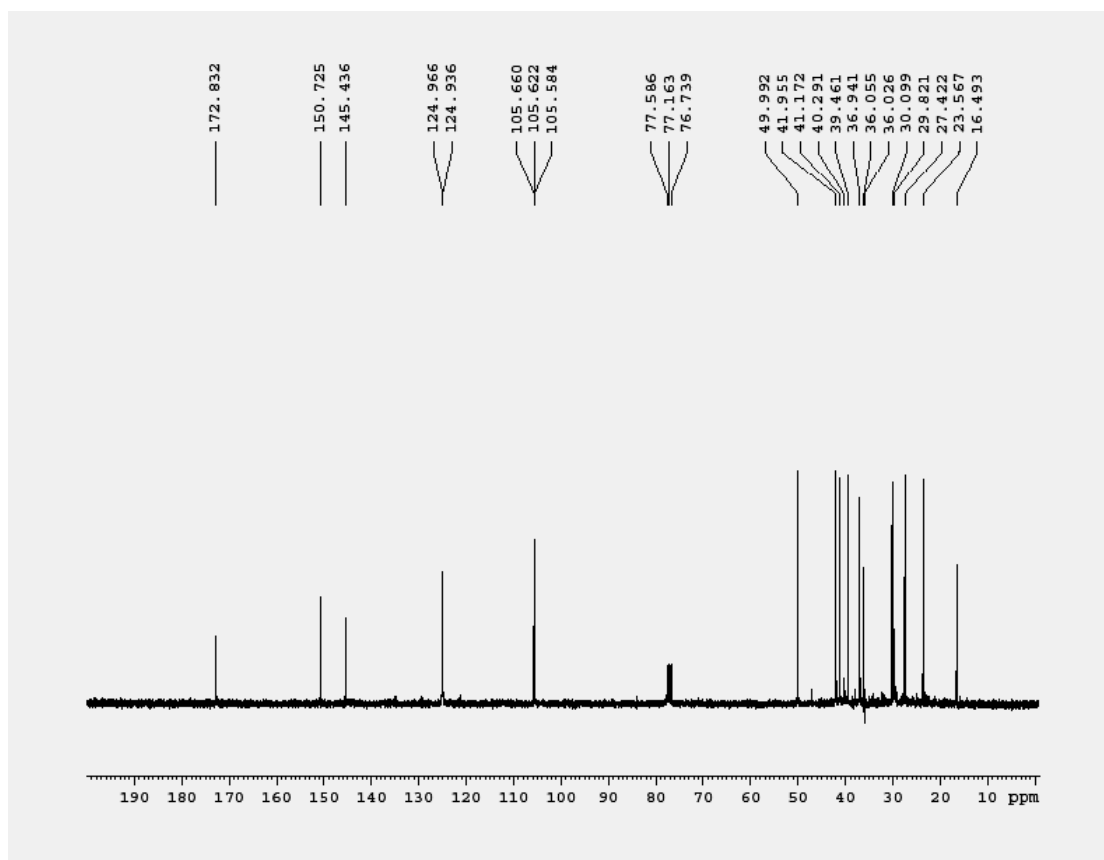

DEPT 45°, 90° and 135° spectra of cistic acid

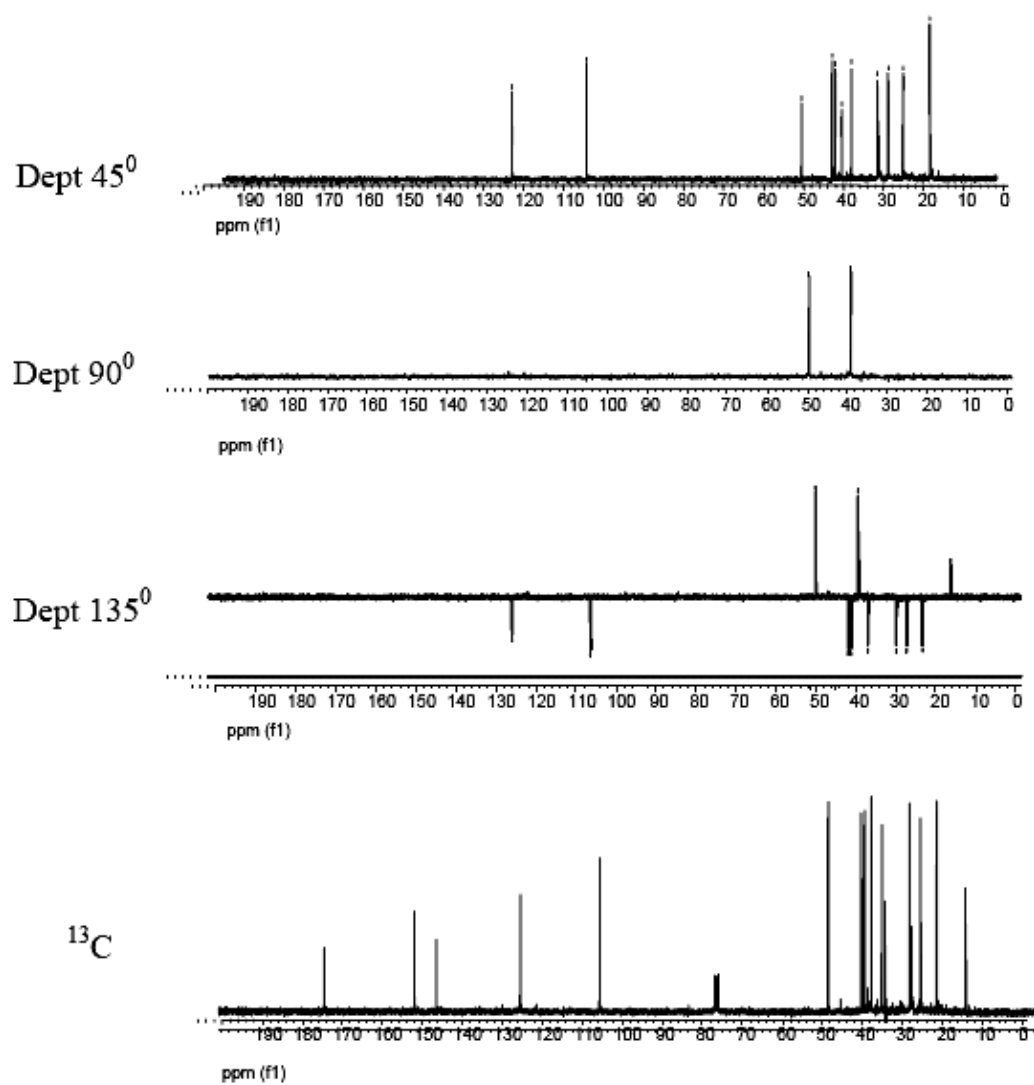

# COSY spectrum of costic acid

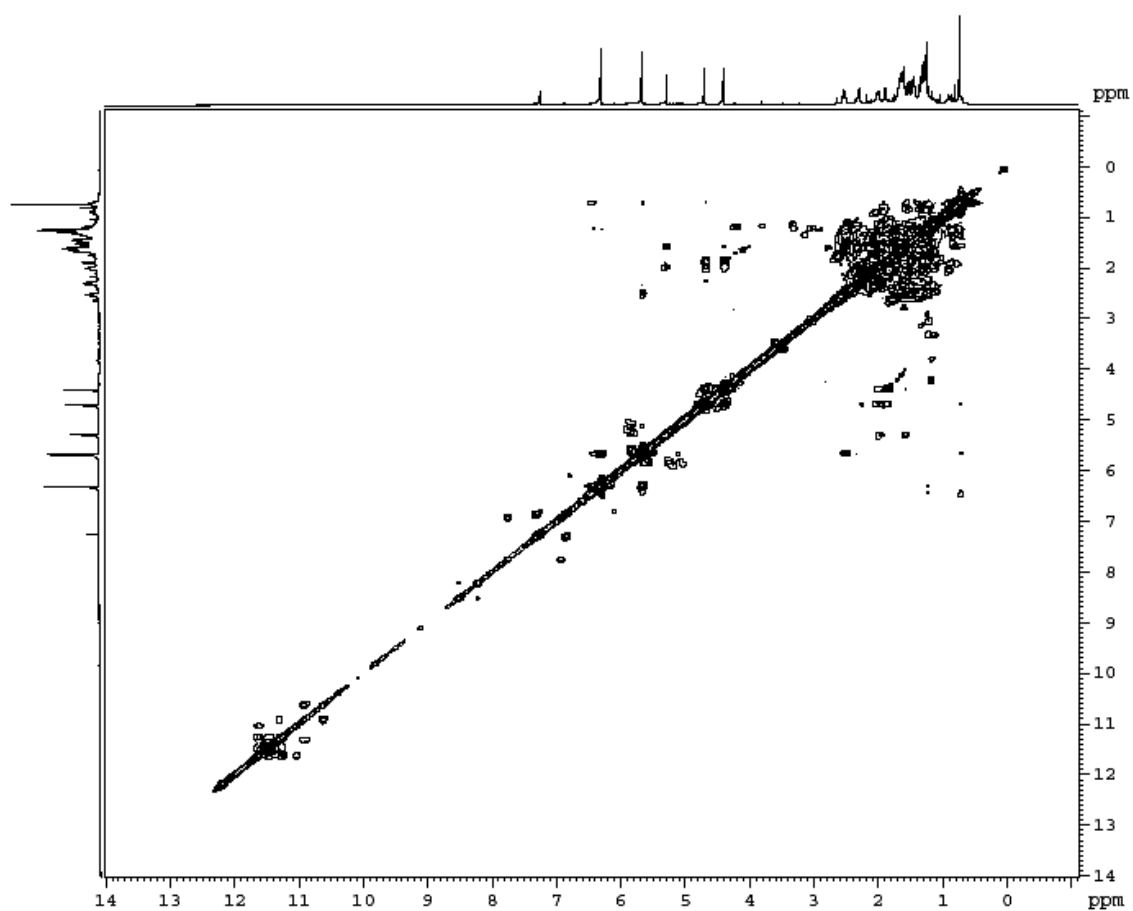

COSY spectrum of costic acid (0.0–4.5 ppm)

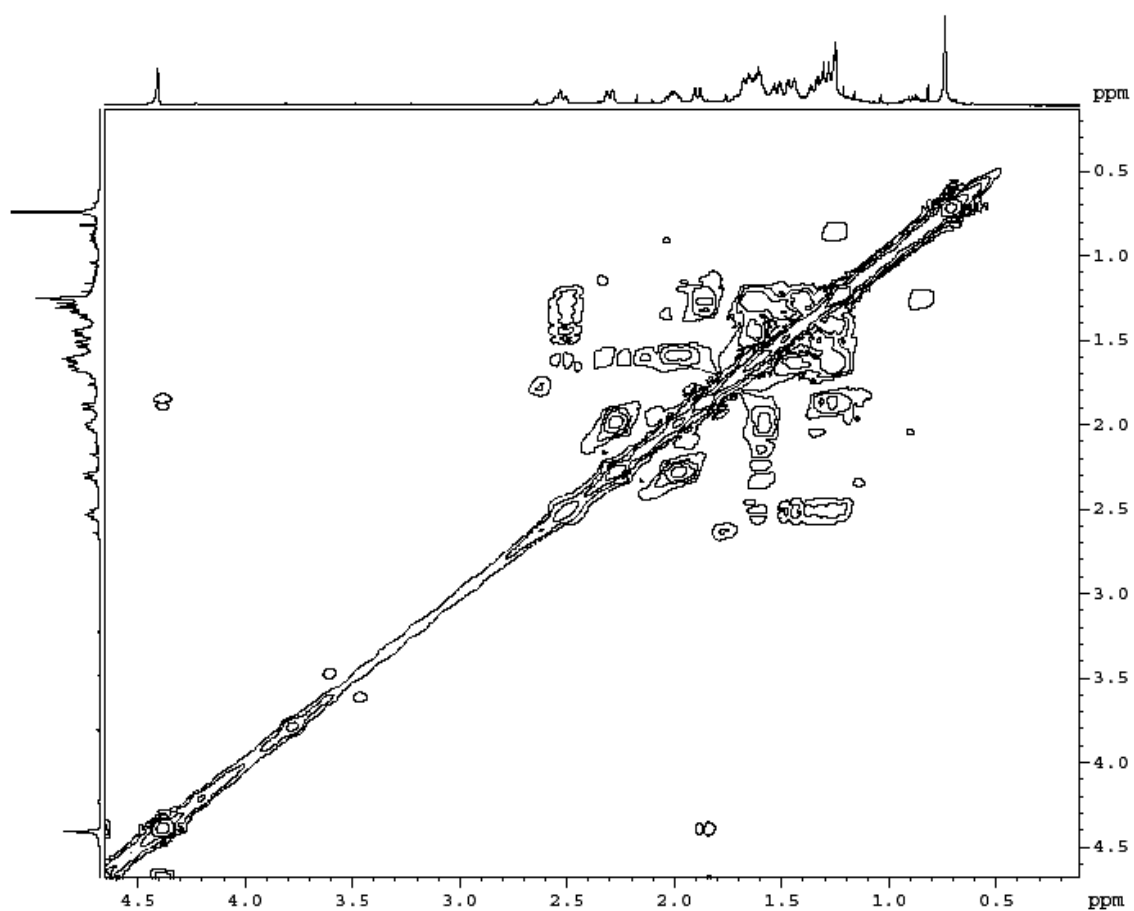

# HMBC spectrum of costic acid

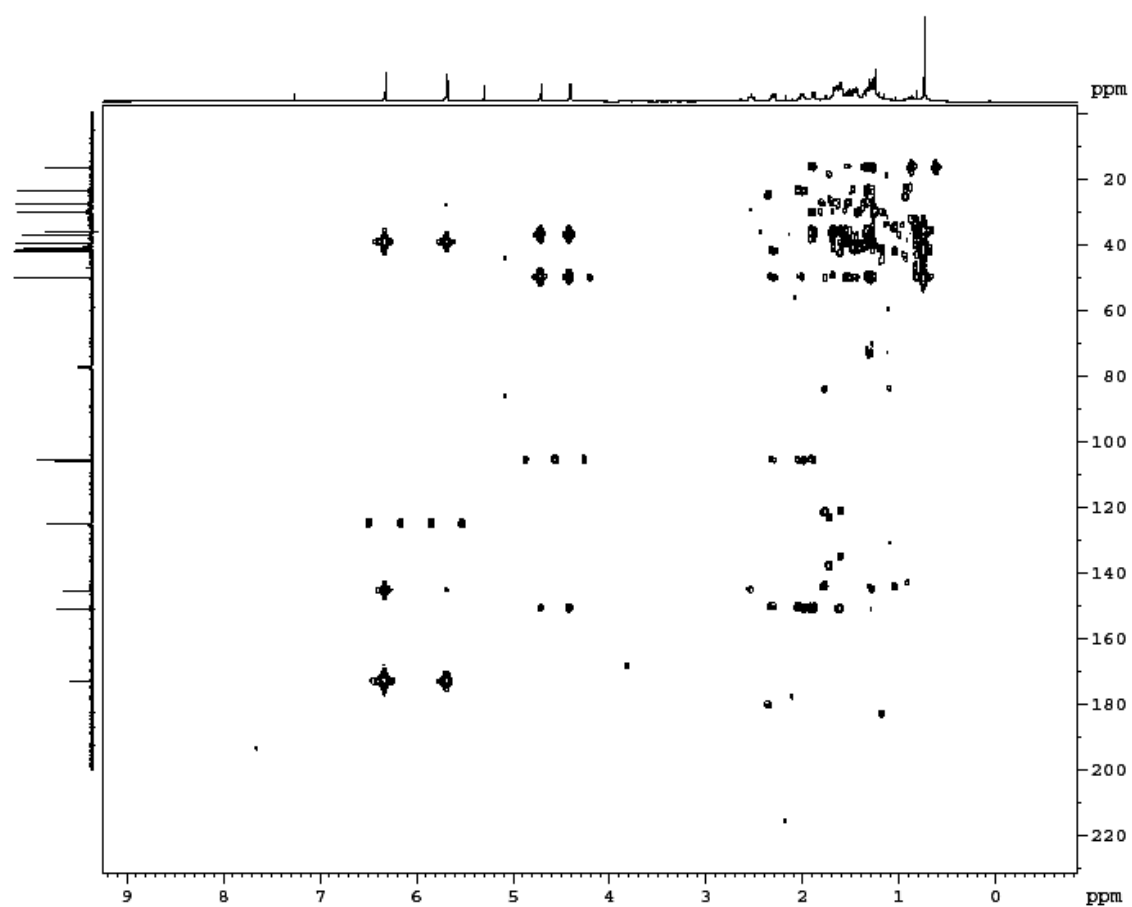

HMBC spectrum of costic acid ( $^{13}\text{C}$ : 0–65 ppm;  $^1\text{H}$ : 0.0–2.6 ppm)

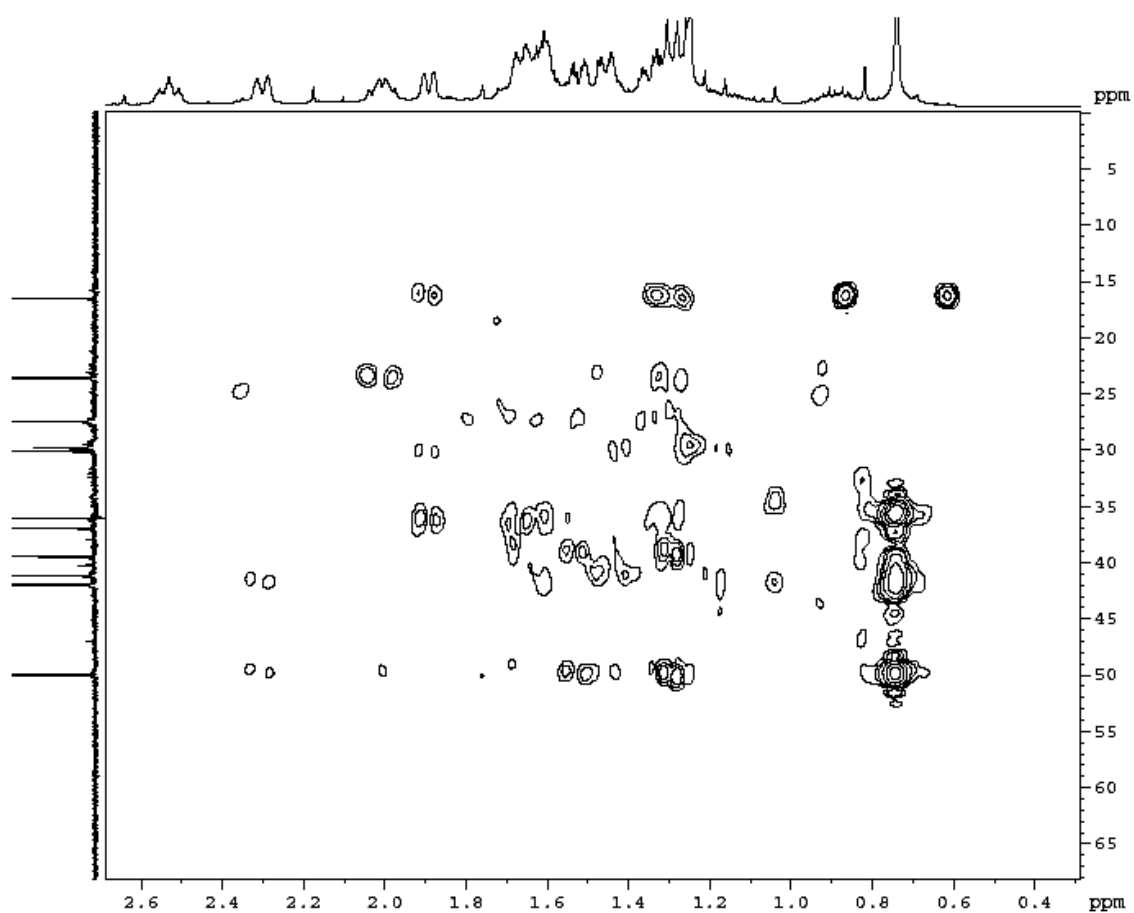



HSQC spectrum of costic acid

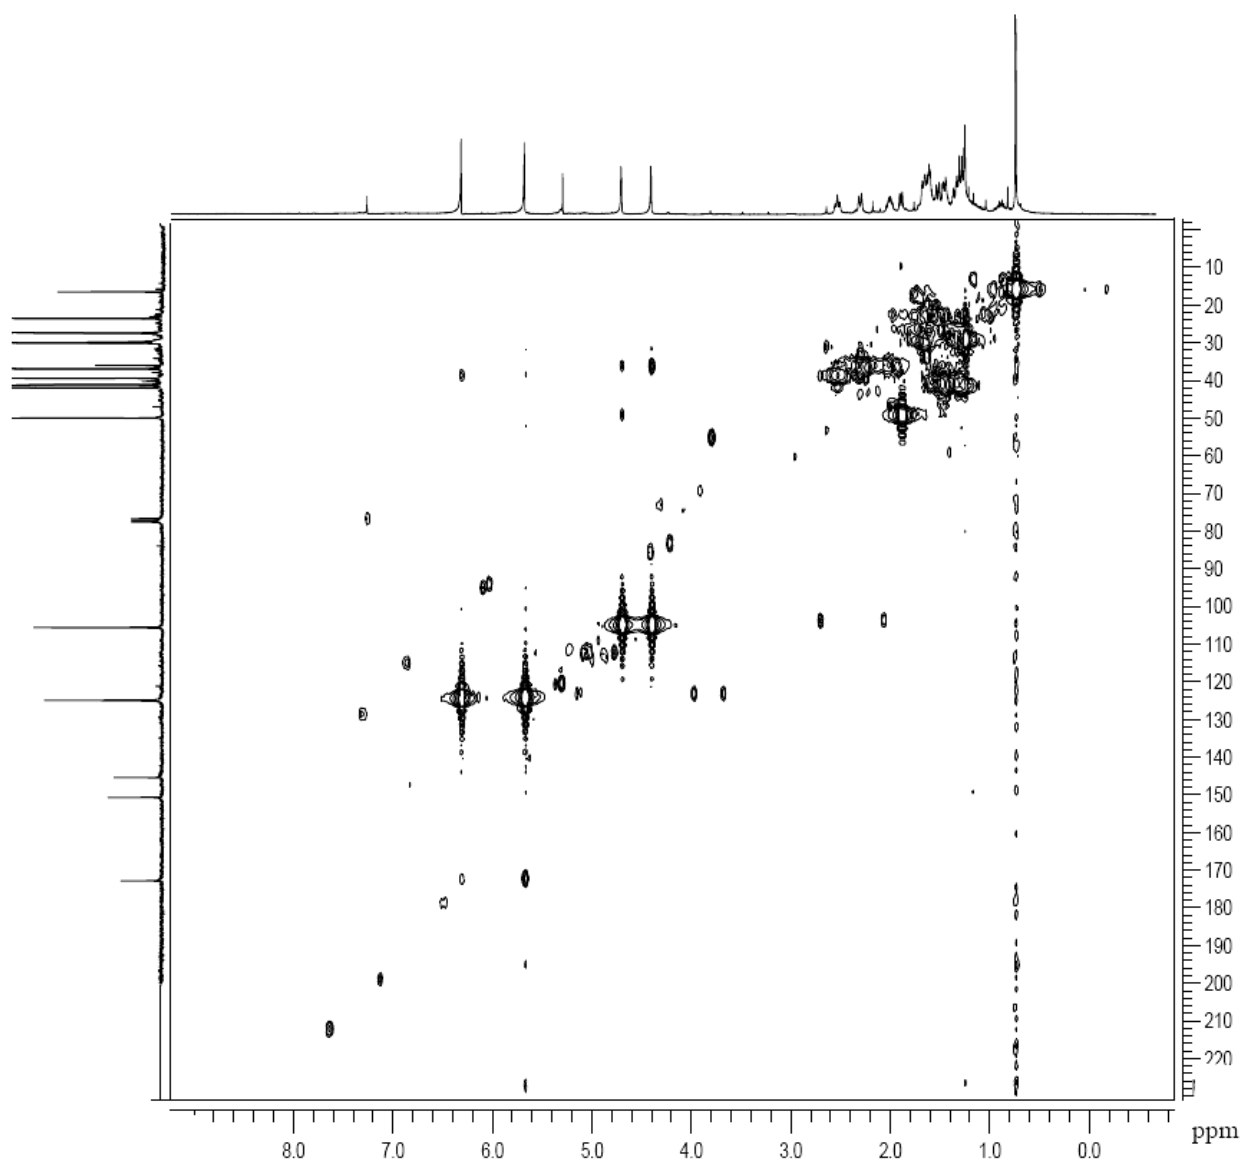

HSQC spectrum of costic acid ( $^{13}\text{C}$ : 0–65 ppm;  $^1\text{H}$ : 0.0–2.6 ppm)

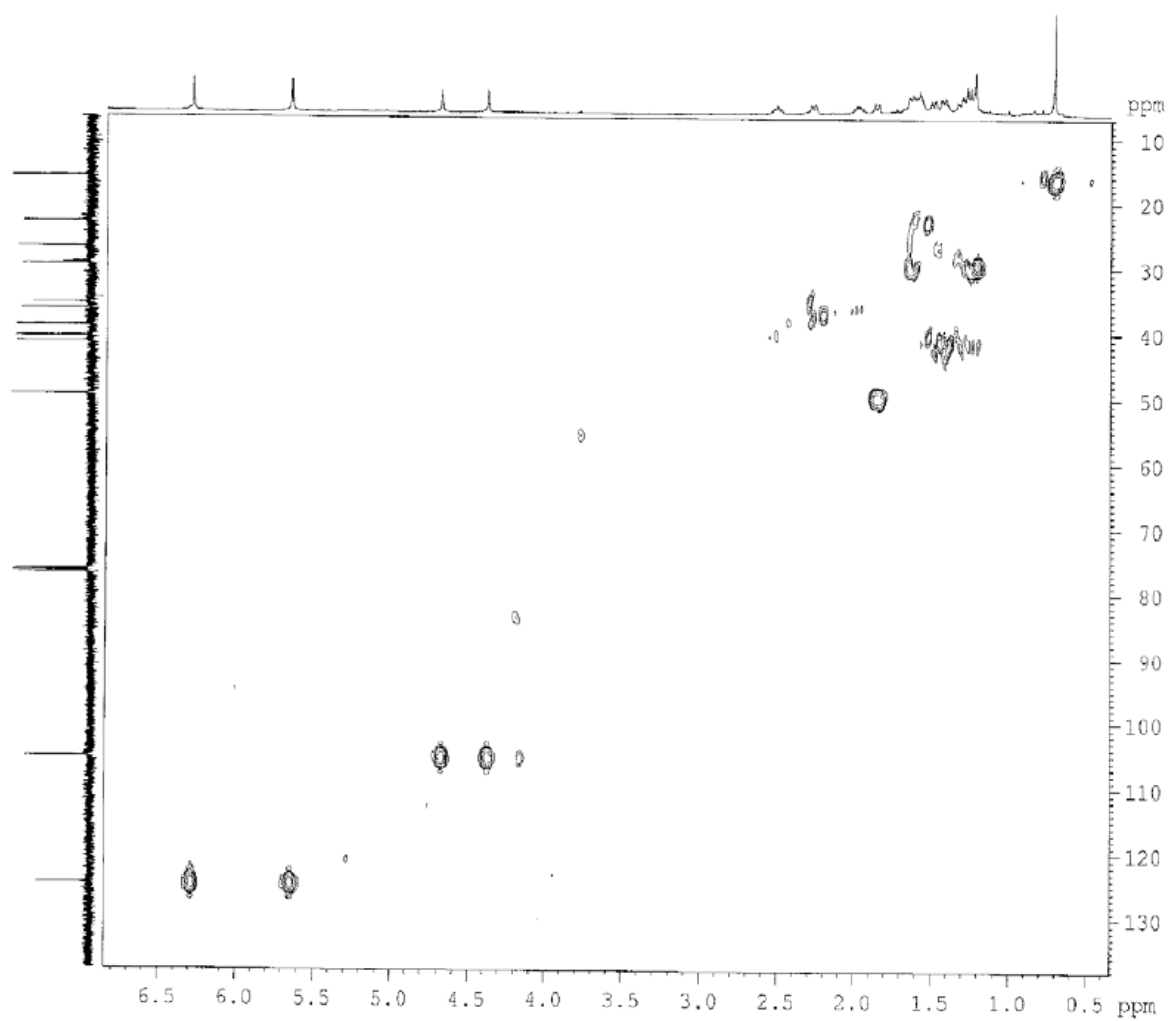

NOESY spectrum of costic acid

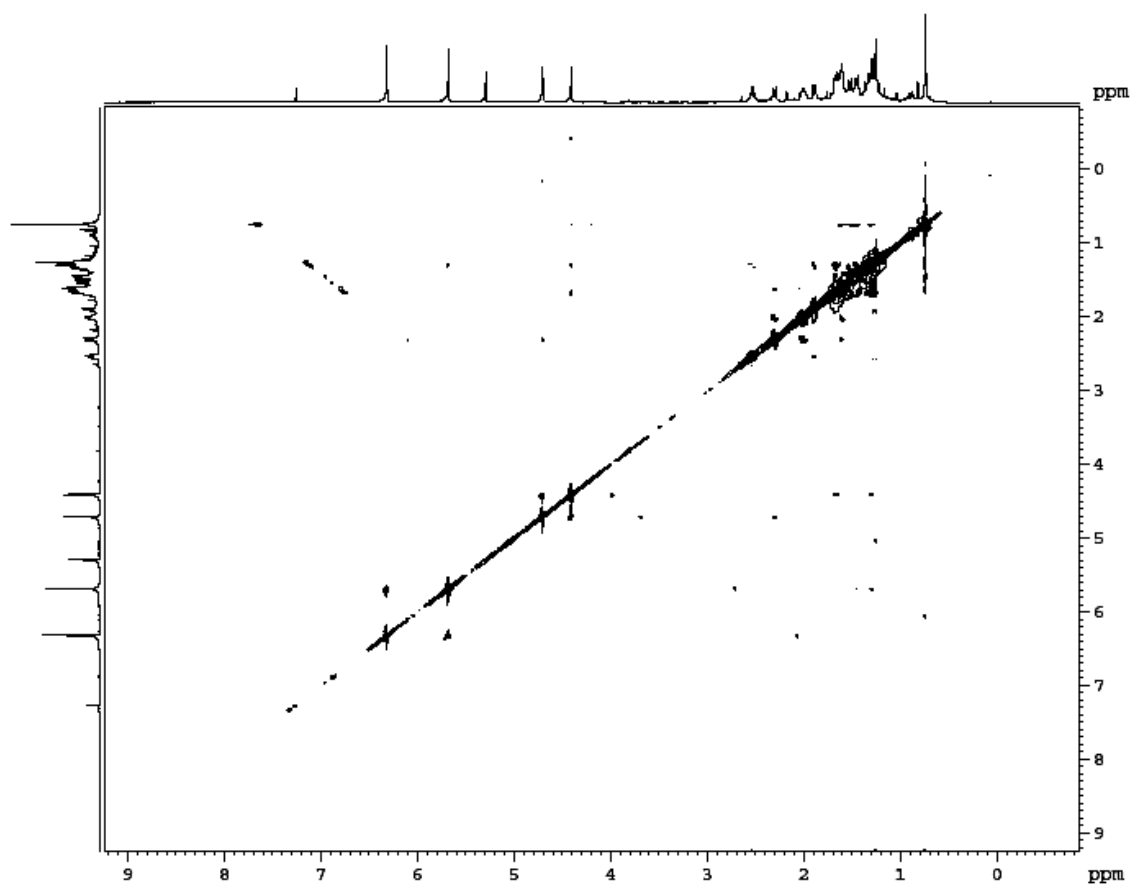

NOESY spectrum of costic acid (0.7–3.1 ppm)

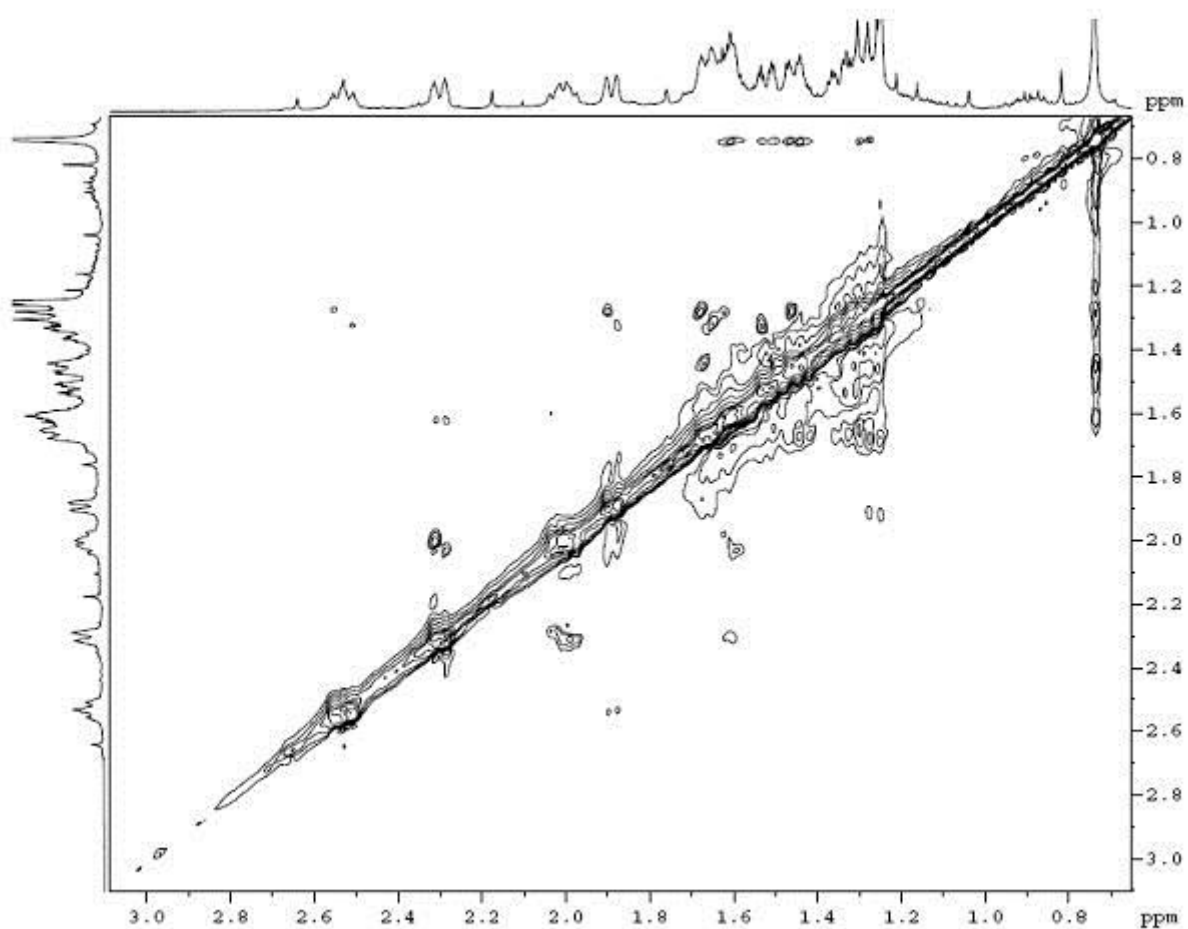

# FTIR spectrum of costic acid

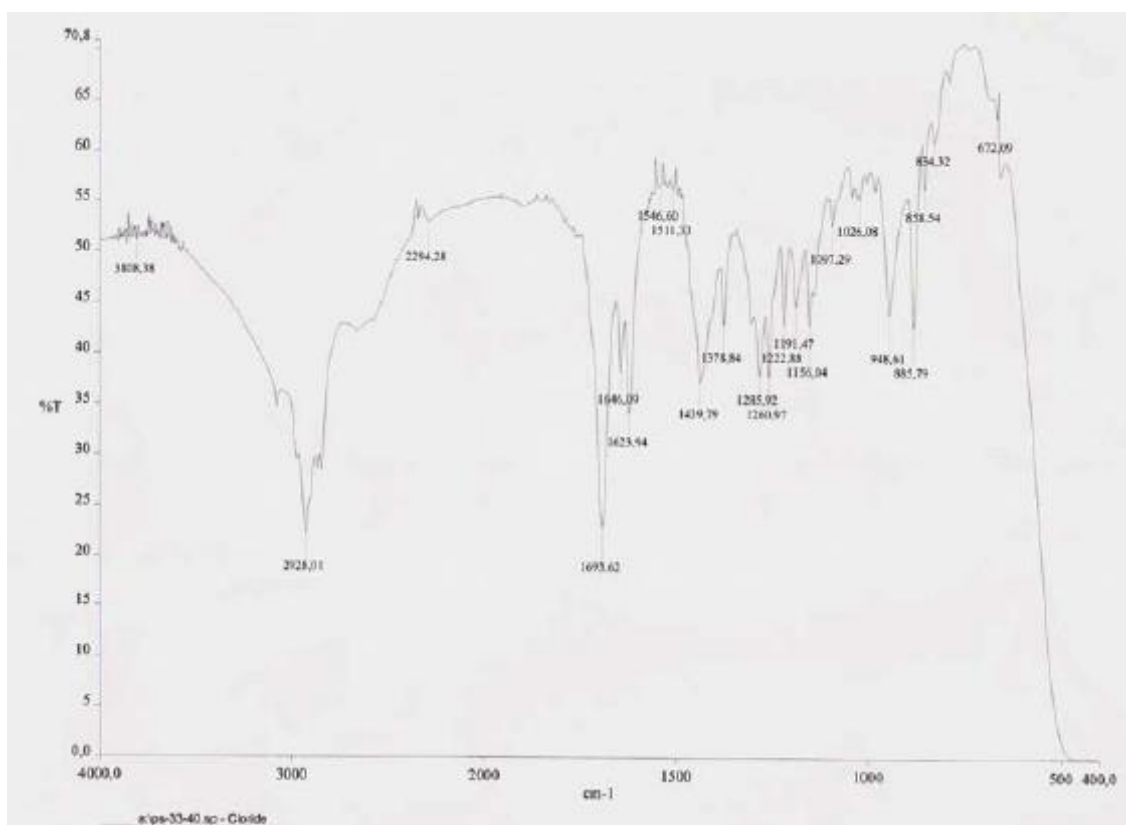

# Mass spectrum of costic acid

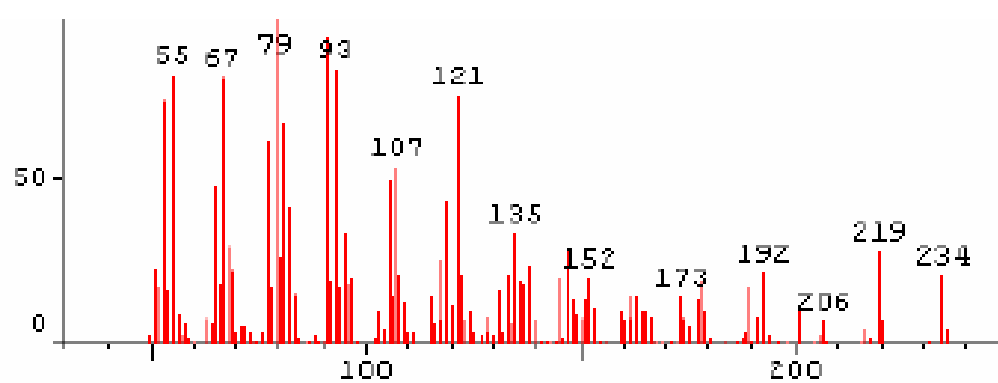

Supplement: Additional file 1 [file 1860-5397-13-96-S1.pdf]
